# Supplementary material for: Quantification of hepatocellular carcinoma heterogeneity with multiparametric magnetic resonance imaging
Source: PubMed Central journal article supplement (PMC5446396; doi:10.1038/s41598-017-02706-z), 2017-05-26
Supplement: 41598_2017_2706_MOESM1_ESM.pdf [file 41598_2017_2706_MOESM1_ESM.pdf]

## Supplementary Information

### **Quantification of hepatocellular carcinoma heterogeneity with multiparametric magnetic resonance imaging.**

Stefanie J Hectors<sup>1,2</sup>, Mathilde Wagner<sup>1,2,3</sup>, Octavia Bane<sup>1,2</sup>, Cecilia Besa<sup>1,2</sup>, Sara Lewis<sup>2</sup>, Romain Remark<sup>4</sup>, Nelson Chen<sup>1,2</sup>, M. Isabel Fiel<sup>5</sup>, Hongfa Zhu<sup>5</sup>, Sacha Gnjatic<sup>6</sup>, Miriam Merad<sup>4</sup>, Yujin Hoshida<sup>7</sup>, Bachir Taouli<sup>1,2</sup>

<sup>1</sup> Translational and Molecular Imaging Institute, Icahn School of Medicine at Mount Sinai, New York, NY, United States

<sup>2</sup> Department of Radiology, Icahn School of Medicine at Mount Sinai, New York, NY, United States

<sup>3</sup> Sorbonne Universités, UPMC, Department of Radiology, Hôpital Pitié-Salpêtrière, Assistance Publique-Hôpitaux de Paris, Paris, France

<sup>4</sup> Immunology Institute, Icahn School of Medicine at Mount Sinai, New York, NY, United States

<sup>5</sup> Department of Pathology, Icahn School of Medicine at Mount Sinai, New York, NY, United States

<sup>6</sup> Oncological Science, Icahn School of Medicine at Mount Sinai, New York, NY, United States

<sup>7</sup> Department of Medicine/Division of Liver Diseases, Icahn School of Medicine at Mount Sinai, New York, NY, United States

**Table S1:** Significant correlations between mean, median, SD, kurtosis and skewness of parameters in ROIs in 39 HCC lesions (32 patients).

| Mean                          | Median                    | SD                                                                           | Kurtosis                                                                     | Skewness                                                                    |                                                                               |
|-------------------------------|---------------------------|------------------------------------------------------------------------------|------------------------------------------------------------------------------|-----------------------------------------------------------------------------|-------------------------------------------------------------------------------|
| $F_a - \Delta R_1$            | $r=0.365$ ,<br>$P=0.012$  | $F_a - \Delta R_1$<br>$r=0.349$<br>$P=0.030$                                 | $ART - R_2^* \text{ pre } O_2$<br>$r=0.418$ ,<br>$P=0.009$                   | $F_a - R_2^* \text{ pre } O_2$<br>$r=0.461$ ,<br>$P=0.003$                  | $F_a - R_2^* \text{ pre } O_2$<br>$r=0.383$ ,<br>$P=0.017$                    |
| $ART - ADC$                   | $r=-0.322$ ,<br>$P=0.046$ | $R_2^* \text{ pre } O_2 - R_1 \text{ pre } O_2$<br>$r=0.318$ ,<br>$P=0.049$  | $MTT - R_2^* \text{ pre } O_2$<br>$r=0.347$ ,<br>$P=0.031$                   | $F_a - R_2^* \text{ post } O_2$<br>$r=0.390$ ,<br>$P=0.015$                 | $F_p - R_2^* \text{ pre } O_2$<br>$r=0.370$ ,<br>$P=0.021$                    |
| $R_2^* \text{ post } - ADC$   | $r=-0.440$ ,<br>$P=0.005$ | $R_2^* \text{ pre } O_2 - R_1 \text{ post } O_2$<br>$r=0.334$ ,<br>$P=0.038$ | $MTT - R_1 \text{ pre } O_2$<br>$r=0.389$ ,<br>$P=0.015$                     | $F_a - \Delta R_2^*$<br>$r=0.429$ ,<br>$P=0.007$                            | $F_t - R_2^* \text{ pre } O_2$<br>$r=0.424$ ,<br>$P=0.008$                    |
| $\Delta R_2^* - ADC$          | $r=-0.383$ ,<br>$P=0.017$ | $R_2^* \text{ pre } O_2 - ADC$<br>$r=-0.350$ ,<br>$P=0.030$                  | $DV - R_1 \text{ pre } O_2$<br>$r=0.458$ ,<br>$P=0.004$                      | $F_p - R_2^* \text{ pre } O_2$<br>$r=0.334$ ,<br>$P=0.038$                  | $R_2^* \text{ pre } O_2 - R_1 \text{ pre } O_2$<br>$r=0.451$ ,<br>$P=0.004$   |
| $R_1 \text{ post } O_2 - ADC$ | $r=-0.348$ ,<br>$P=0.031$ | $R_2^* \text{ post } O_2 - ADC$<br>$r=-0.477$ ,<br>$P=0.002$                 | $R_2^* \text{ pre } O_2 - R_1 \text{ post } O_2$<br>$r=0.338$ ,<br>$P=0.036$ | $F_p - R_1 \text{ pre } O_2$<br>$r=0.330$ ,<br>$P=0.041$                    | $R_2^* \text{ pre } O_2 - R_1 \text{ post } O_2$<br>$r=0.473$ ,<br>$P=0.003$  |
|                               |                           | $R_1 \text{ post } O_2 - ADC$<br>$r=-0.388$ ,<br>$P=0.015$                   | $R_2^* \text{ pre } O_2 - \Delta R_1$<br>$r=0.326$ ,<br>$P=0.044$            | $F_t - R_2^* \text{ pre } O_2$<br>$r=0.590$ ,<br>$P<0.001$                  | $R_2^* \text{ pre } O_2 - ADC$<br>$r=-0.461$ ,<br>$P=0.003$                   |
|                               |                           |                                                                              | $R_2^* \text{ pre } O_2 - ADC$<br>$r=0.457$ ,<br>$P=0.004$                   | $F_t - R_2^* \text{ post } O_2$<br>$r=0.397$ ,<br>$P=0.013$                 | $R_2^* \text{ post } O_2 - R_1 \text{ post } O_2$<br>$r=0.404$ ,<br>$P=0.011$ |
|                               |                           |                                                                              | $R_2^* \text{ post } O_2 - ADC$<br>$r=0.425$ ,<br>$P=0.007$                  | $F_t - \Delta R_2^*$<br>$r=0.381$ ,<br>$P=0.002$                            | $R_2^* \text{ post } O_2 - ADC$<br>$r=-0.390$ ,<br>$P=0.015$                  |
|                               |                           |                                                                              | $\Delta R_2^* - ADC$<br>$r=0.351$ ,<br>$P=0.029$                             | $DV - R_2^* \text{ pre } O_2$<br>$r=0.350$ ,<br>$P=0.030$                   | $R_1 \text{ post } O_2 - ADC$<br>$r=-0.383$ ,<br>$P=0.017$                    |
|                               |                           |                                                                              | $R_1 \text{ pre } O_2 - ADC$<br>$r=-0.334$ ,<br>$P=0.038$                    | $DV - R_2^* \text{ post } O_2$<br>$r=0.325$ ,<br>$P=0.044$                  | $\Delta R_1 - ADC$<br>$r=-0.349$ ,<br>$P=0.030$                               |
|                               |                           |                                                                              |                                                                              | $DV - ADC$<br>$r=-0.340$ ,<br>$P=0.035$                                     |                                                                               |
|                               |                           |                                                                              |                                                                              | $R_2^* \text{ pre } O_2 - R_1 \text{ pre } O_2$<br>$r=0.391$ ,<br>$P=0.014$ |                                                                               |
|                               |                           |                                                                              |                                                                              | $R_2^* \text{ pre } O_2 - \Delta R_1$<br>$r=0.396$ ,<br>$P=0.013$           |                                                                               |
|                               |                           |                                                                              |                                                                              | $R_2^* \text{ post } O_2 - \Delta R_1$<br>$r=0.394$ ,<br>$P=0.014$          |                                                                               |
|                               |                           |                                                                              |                                                                              | $\Delta R_2^* - R_1 \text{ pre } O_2$<br>$r=0.398$ ,<br>$P=0.013$           |                                                                               |
|                               |                           |                                                                              |                                                                              | $\Delta R_2^* - \Delta R_1$<br>$r=0.375$ ,<br>$P=0.019$                     |                                                                               |

ADC = apparent diffusion coefficient, ART = arterial fraction, DV = distribution volume,  $F_a$  = arterial flow,  $F_p$  = portal flow,  $F_t$  = total flow, MTT = mean transit time,  $R_1$  = longitudinal relaxation rate,  $R_2^*$  = transverse relaxation rate

**Table S2:** Significant correlations of MRI parameters with histopathology in 14 HCC lesions (14 patients).

| Mean                                           | Median               | SD                                             | Kurtosis             | Skewness                                        |                      |             |                      |                                              |                      |
|------------------------------------------------|----------------------|------------------------------------------------|----------------------|-------------------------------------------------|----------------------|-------------|----------------------|----------------------------------------------|----------------------|
| CD3 –<br>R <sub>1</sub> pre O <sub>2</sub>     | r=-0.591,<br>P=0.029 | CD3 –<br>R <sub>1</sub> pre O <sub>2</sub>     | r=-0.591,<br>P=0.029 | CD3 –<br>F <sub>p</sub>                         | r=0.771,<br>P=0.002  | CD3 –<br>DV | r=-0.565,<br>P=0.038 | CD68 –<br>ΔR <sub>2</sub> *                  | r=-0.684,<br>P=0.009 |
| CD31 –<br>R <sub>2</sub> * pre O <sub>2</sub>  | r=-0.701,<br>P=0.007 | CD31 –<br>R <sub>2</sub> * pre O <sub>2</sub>  | r=-0.684,<br>P=0.009 | CD3 –<br>F <sub>t</sub>                         | r=0.749,<br>P=0.003  |             |                      | HIF1α –<br>R <sub>1</sub> pre O <sub>2</sub> | r=0.543,<br>P=0.048  |
| CD31 –<br>R <sub>2</sub> * post O <sub>2</sub> | r=-0.851,<br>P=0.000 | CD31 –<br>R <sub>2</sub> * post O <sub>2</sub> | r=-0.864,<br>P=0.000 | CD3 –<br>ΔR <sub>2</sub> *                      | r=0.538,<br>P=0.050  |             |                      |                                              |                      |
| CD68 –<br>R <sub>1</sub> pre O <sub>2</sub>    | r=-0.560,<br>P=0.040 | CD68 –<br>R <sub>1</sub> pre O <sub>2</sub>    | r=-0.560,<br>P=0.040 | CD31 –<br>R <sub>1</sub> pre O <sub>2</sub>     | r=-0.666,<br>P=0.011 |             |                      |                                              |                      |
| CD68 –<br>ADC                                  | r=0.538,<br>P=0.050  | CD68 –<br>R <sub>1</sub> post O <sub>2</sub>   | r=-0.552,<br>P=0.044 | CD31 –<br>R <sub>1</sub> post O <sub>2</sub>    | r=-0.538,<br>P=0.050 |             |                      |                                              |                      |
|                                                |                      | CD68 –<br>ADC                                  | r=0.591,<br>P=0.029  | HIF1α –<br>R <sub>2</sub> * pre O <sub>2</sub>  | r=0.622,<br>P=0.020  |             |                      |                                              |                      |
|                                                |                      |                                                |                      | HIF1α –<br>R <sub>2</sub> * post O <sub>2</sub> | r=0.596,<br>P=0.028  |             |                      |                                              |                      |

ADC = apparent diffusion coefficient, ART = arterial fraction, CD3 = cluster of differentiation 3, CD31 = cluster of differentiation 31, CD68 = cluster of differentiation 68, DV = distribution volume, F<sub>a</sub> = arterial flow, F<sub>p</sub> = portal flow, F<sub>t</sub> = total flow, HIF1α = hypoxia-inducible factor 1-alpha, MTT = mean transit time, R<sub>1</sub> = longitudinal relaxation rate, R<sub>2</sub>\* = transverse relaxation rate

**Table S3:** Significant correlations of MRI parameters with gene expression levels in 14 HCC lesions (14 patients).

| Mean                                            | Median                                          | SD                                                               | Kurtosis                                                             | Skewness                                          |
|-------------------------------------------------|-------------------------------------------------|------------------------------------------------------------------|----------------------------------------------------------------------|---------------------------------------------------|
| HSP70 –<br>F <sub>p</sub> r=-0.675,<br>P=0.010  | BIRC5 –<br>ART r=0.536,<br>P=0.048              | KRT19 –<br>ART r=0.697,<br>P=0.007                               | GLUL –<br>ΔR <sub>1</sub> r=0.587,<br>P=0.030                        | GLUL –<br>F <sub>p</sub> r=0.596,<br>P=0.028      |
| EZH2 –<br>F <sub>a</sub> r=-0.670,<br>P=0.011   | HSP70 –<br>F <sub>p</sub> r=-0.578,<br>P=0.030  | KRT19 –<br>MTT r=0.547,<br>P=0.046                               | EPCAM –<br>R <sub>2</sub> * post O <sub>2</sub> r=-0.591,<br>P=0.029 | GLUL –<br>F <sub>t</sub> r=0.631,<br>P=0.018      |
| EZH2 –<br>F <sub>t</sub> r=-0.622,<br>P=0.020   | HSP70 –<br>ΔR <sub>1</sub> r=-0.591,<br>P=0.029 | HSP70 –<br>F <sub>p</sub> r=-0.697,<br>P=0.007                   | EPCAM –<br>ΔR <sub>1</sub> r=-0.692,<br>P=0.008                      | EPCAM –<br>ΔR <sub>1</sub> r=-0.644,<br>P=0.015   |
| EZH2 –<br>ΔR <sub>1</sub> r=-0.622,<br>P=0.020  | LYVE1 –<br>F <sub>a</sub> r=-0.591,<br>P=0.029  | HSP70 –<br>F <sub>t</sub> r=-0.547,<br>P=0.046                   | EPCAM –<br>ADC r=-0.635,<br>P=0.017                                  | BIRC5 –<br>ΔR <sub>2</sub> * r=-0.582,<br>P=0.032 |
| VEGFA –<br>F <sub>a</sub> r=-0.547,<br>P=0.046  | LYVE1 –<br>F <sub>t</sub> r=-0.596,<br>P=0.028  | LYVE1 –<br>ART r=0.538,<br>P=0.050                               | KRT19 –<br>F <sub>a</sub> r=0.596,<br>P=0.028                        | BIRC5 –<br>ΔR <sub>1</sub> r=0.600,<br>P=0.026    |
| VEGFA –<br>F <sub>p</sub> r=-0.609,<br>P=0.024  | EZH2 –<br>F <sub>a</sub> r=-0.622,<br>P=0.020   | VEGFA –<br>R <sub>1</sub> pre O <sub>2</sub> r=0.622,<br>P=0.020 | KRT19 –<br>ADC r=-0.574,<br>P=0.035                                  | HSP70 –<br>F <sub>p</sub> r=0.569,<br>P=0.037     |
| VEGFA –<br>F <sub>t</sub> r=-0.666,<br>P=0.011  | EZH2 –<br>F <sub>p</sub> r=-0.538,<br>P=0.047   | FGFR4 –<br>ΔR <sub>2</sub> * r=0.596,<br>P=0.028                 | BIRC5 –<br>DV r=-0.662,<br>P=0.012                                   | HSP70 –<br>ART r=-0.552,<br>P=0.044               |
| VEGFA –<br>MTT r=0.538,<br>P=0.050              | EZH2 –<br>F <sub>t</sub> r=-0.565,<br>P=0.038   | CD274 –<br>F <sub>a</sub> r=-0.543,<br>P=0.048                   | HSP70 –<br>F <sub>p</sub> r=0.582,<br>P=0.032                        | HSP70 –<br>ADC r=0.622,<br>P=0.012                |
| VEGFA –<br>ΔR <sub>1</sub> r=-0.662,<br>P=0.012 | VEGFA –<br>F <sub>a</sub> r=-0.609,<br>P=0.024  | PDCD1 –<br>MTT r=0.565,<br>P=0.038                               | HSP70 –<br>ΔR <sub>1</sub> r=0.574,<br>P=0.035                       | VEGFA –<br>F <sub>p</sub> r=0.754,<br>P=0.003     |
| CD274 –<br>F <sub>a</sub> r=-0.675,<br>P=0.010  | VEGFA –<br>F <sub>p</sub> r=-0.653,<br>P=0.011  | PDCD1 –<br>R <sub>1</sub> pre O <sub>2</sub> r=0.569,<br>P=0.037 | LYVE1 –<br>ΔR <sub>2</sub> * r=0.547,<br>P=0.046                     | VEGFA –<br>F <sub>t</sub> r=0.578,<br>P=0.033     |
| CD274 –<br>F <sub>t</sub> r=-0.574,<br>P=0.035  | VEGFA –<br>F <sub>t</sub> r=-0.622,<br>P=0.020  |                                                                  | EZH2 –<br>R <sub>2</sub> * pre O <sub>2</sub> r=0.618,<br>P=0.021    | VEGFA –<br>ART r=-0.684,<br>P=0.009               |
| CTLA4 –<br>F <sub>a</sub> r=-0.552,<br>P=0.044  | CD274 –<br>F <sub>a</sub> r=-0.653,<br>P=0.014  |                                                                  | VEGFA –<br>F <sub>p</sub> r=0.749,<br>P=0.003                        | FGFR4 –<br>DV r=-0.670,<br>P=0.011                |
|                                                 | CD274 –<br>F <sub>t</sub> r=-0.578,<br>P=0.033  |                                                                  | CD274 –<br>ΔR <sub>2</sub> * r=0.591,<br>P=0.029                     |                                                   |

ADC = apparent diffusion coefficient, ART = arterial fraction, BIRC5 = Baculoviral IAP repeat containing 5, CD274 = cluster of differentiation 274, CTLA4 = cytotoxic T-lymphocyte-associated protein 4, DV = distribution volume, EPCAM = epithelial cell adhesion molecule, EZH2 = enhancer of zeste homolog 2, F<sub>a</sub> = arterial flow, FGFR4 = fibroblast growth factor receptor 4, F<sub>p</sub> = portal flow, F<sub>t</sub> = total flow, GLUL = glutamate-ammonia ligase, HSP70 = 70 kilodalton heat shock protein, KRT19 = keratin 19, LYVE1 = lymphatic vessel endothelial hyaluronan receptor 1, MTT = mean transit time, R<sub>1</sub> = longitudinal relaxation rate, R<sub>2</sub>\* = transverse relaxation rate, VEGFA = vascular endothelial growth factor A
